# Supplementary material for: Association of Vitamin D Metabolism Gene Polymorphisms with Autoimmunity: Evidence in Population Genetic Studies
Source: MDPI journal article supplement (doi:10.3390/ijms21249626), 2020-12-17
Supplement: s1 [file s1]

**Table S1.** Studies of polymorphisms in vitamin D metabolism genes and its association with multiple sclerosis.

| Gene           | Polymorphism                                                                                    | Population                                                            | Location and year             | Study design    | Association                                                                                                                                                                                                                                                                                                                                                                                 | Ref   |
|----------------|-------------------------------------------------------------------------------------------------|-----------------------------------------------------------------------|-------------------------------|-----------------|---------------------------------------------------------------------------------------------------------------------------------------------------------------------------------------------------------------------------------------------------------------------------------------------------------------------------------------------------------------------------------------------|-------|
| <i>GC</i>      | rs2282679                                                                                       |                                                                       |                               |                 | T allele was associated with 4.5 nmol/L higher calcidiol levels                                                                                                                                                                                                                                                                                                                             | (71)  |
| <i>CYP2R1</i>  | rs10741657                                                                                      | 1497 MS patients                                                      | Denmark 2015                  | Cross-sectional | AA and AG genotypes were associated with 6.9 nmol/L higher calcidiol levels                                                                                                                                                                                                                                                                                                                 | (71)  |
| <i>CYP27B1</i> | rs10877012                                                                                      | 2158 MS patients and 1759 CS                                          | Sweden 2010                   | Case-control    | <b>Genetic risk to MS:</b> T allele (OR=0.88)                                                                                                                                                                                                                                                                                                                                               | (80)  |
|                | <i>TaqI</i> rs731236<br><i>FokI</i> rs2228570                                                   | 727 MS patients and 604 CS                                            | Australia and UK 2012         | Case-control    | <b>Genetic risk to MS:</b> <i>TaqI</i> t allele (OR =1.096)                                                                                                                                                                                                                                                                                                                                 | (101) |
|                | <i>Apal</i> rs7975232<br><i>TaqI</i> rs731236<br><i>BsmI</i> rs1544410                          | 270 MS patients and 303 CS                                            | Slovenia 2016                 | Case-control    | <b>Protection to MS:</b> <i>BsmI</i> AA (or BB genotype) (OR = 0.59) in a recessive genetic model                                                                                                                                                                                                                                                                                           | (117) |
|                | <i>FokI</i> rs2228570                                                                           | 270 MS patients and 303 CS                                            | Slovenia 2015                 | Case-control    | <b>Genetic risk to MS:</b> <i>FokI</i> Ff genotype (OR =1.48)                                                                                                                                                                                                                                                                                                                               | (114) |
|                | <i>FokI</i> rs2228570                                                                           | 533 MS patients and 446 CS                                            | Portugal 2017                 | Case-control    | <b>Genetic risk to MS:</b> <i>FokI</i> ff genotype (OR =1.687 )                                                                                                                                                                                                                                                                                                                             | (115) |
|                | <i>TaqI</i> rs731236<br><i>FokI</i> rs2228570                                                   | 303 MS patients and 310 CS                                            | Spain 2013                    | Case-control    | No genetic risk association to MS was found                                                                                                                                                                                                                                                                                                                                                 | (102) |
|                | <i>FokI</i> rs2228570<br><i>BsmI</i> rs1544410<br><i>Apal</i> rs7975232<br><i>TaqI</i> rs731236 | 3300 MS patients and 3194 CS from 13 case– control studies            | Asia, Australia, America 2014 | Meta-analysis   | <b>Genetic risk to MS:</b> <i>FokI</i> FF and Ff genotypes (OR = 1.311) in a dominant genetic model, and FF genotype (OR =1.314) compared to ff genotype in overall populations; <i>Apal</i> AA genotype (OR = 1.468) compared to Aa genotype; AA genotype (OR=1.588) in a recessive genetic model; and AA and aa genotypes (OR=1.302) in a homozygous genetic model in overall populations | (113) |
|                | <i>FokI</i> rs2228570<br><i>BsmI</i> rs1544410<br><i>Apal</i> rs7975232<br><i>TaqI</i> rs731236 | 1364 MS patients and 1661 unaffected first degree relatives           | Canada 2011                   | Case-control    | No genetic risk association to MS was found after Bonferroni correction                                                                                                                                                                                                                                                                                                                     | (103) |
| <i>VDR</i>     | <i>FokI</i> rs2228570<br><i>BsmI</i> rs1544410<br><i>Apal</i> rs7975232<br><i>TaqI</i> rs731236 | 30 case–control studies were included in the meta-analysis            | Worldwide 2019                | Meta-analysis   | <b>Genetic risk to MS:</b> <i>BsmI</i> bb genotype (OR =1.78) in a recessive genetic model in Asian population; <i>TaqI</i> Tt genotype (OR = 1.27) compared to TT genotype in overall populations. <b>Protection to MS:</b> <i>Apal</i> aa genotype (OR =0.61) in a recessive genetic model, and aa genotype (OR =0.52) compared to AA genotype in Asian Population                        | (108) |
|                | <i>FokI</i> rs2228570<br><i>BsmI</i> rs1544410<br><i>Apal</i> rs7975232<br><i>TaqI</i> rs731236 | 214 MS patients and 428 age-matched CS                                | United states 2010            | Case-control    | No genetic risk association to MS was found                                                                                                                                                                                                                                                                                                                                                 | (104) |
|                | <i>FokI</i> rs2228570<br><i>Apal</i> rs7975232<br><i>TaqI</i> rs731236                          | 167 MS patients and 146 CS                                            | Turkey 2018                   | Case-control    | <b>High frequency of risk genotype AA (FF) in MS patients vs. CS:</b><br><i>FokI</i> AA (or FF) genotype: 9% vs. 4.1%, ( $p = 0.02$ ); A (or F) allele: 32% vs. 19.9% ( $p = 0.001$ )                                                                                                                                                                                                       | (118) |
|                | <i>FokI</i> rs2228570<br><i>BsmI</i> rs1544410<br><i>Apal</i> rs7975232<br><i>TaqI</i> rs731236 | 80 MS patients and 50 age-matched CS                                  | Iran 2015                     | Case-control    | <b>Frequency differed significantly between MS patients vs. CS:</b><br><i>BsmI</i> bb genotype: 21.25% vs. 10% ( $p=0.023$ ); <i>Apal</i> Aa genotype: 66.25% vs. 44% ( $p=0.042$ )                                                                                                                                                                                                         | (105) |
|                | <i>FokI</i> rs2228570<br><i>BsmI</i> rs1544410                                                  | 113 MS patients and 122 CS                                            | South East Iran 2015          | Case-control    | No genetic risk association to MS was found                                                                                                                                                                                                                                                                                                                                                 | (107) |
|                | <i>FokI</i> rs2228570<br><i>BsmI</i> rs1544410<br><i>Apal</i> rs7975232<br><i>TaqI</i> rs731236 | 4013 MS patients and 4218 CS in 24 case-control studies meta-analyses | Asian and Caucasian 2018      | Meta-analysis   | <b>Genetic risk to MS:</b> <i>Apal</i> A allele (OR = 1.267) in Asian populations                                                                                                                                                                                                                                                                                                           | (111) |
|                | <i>FokI</i> rs2228570<br><i>BsmI</i> rs1544410<br><i>Apal</i> rs7975232                         | 1206 MS patients and 1402 CS in 9 case-                               | Iranian population 2020       | Meta-analysis   | <b>Protection to MS:</b> <i>BsmI</i> B allele (OR= 0.69), BB genotype (OR=0.46) in a homozygote genetic model, and BB genotype (OR=0.56) in a recessive genetic model; <i>Apal</i> allele A (OR =                                                                                                                                                                                           | (109) |

|                                                                                                                                                                                                                                                                                                                                     |                                                                           |                           |               |                                                                                                                                                                                                                                                                                                                                                                                                                                                                                                                                                              |       |
|-------------------------------------------------------------------------------------------------------------------------------------------------------------------------------------------------------------------------------------------------------------------------------------------------------------------------------------|---------------------------------------------------------------------------|---------------------------|---------------|--------------------------------------------------------------------------------------------------------------------------------------------------------------------------------------------------------------------------------------------------------------------------------------------------------------------------------------------------------------------------------------------------------------------------------------------------------------------------------------------------------------------------------------------------------------|-------|
| <i>TaqI</i> rs731236                                                                                                                                                                                                                                                                                                                | control studies were included                                             |                           |               | 0.54) and AA genotype (OR = 0.28) in a homozygote genetic model, AA and Aa genotypes (OR = 0.56) in a dominant genetic model, and AA genotype (OR=0.35) in a recessive genetic model; <i>TaqI</i> TT genotype (OR = 0.28) in a homozygote genetic model                                                                                                                                                                                                                                                                                                      |       |
| <i>FokI</i> rs2228570<br><i>BsmI</i> rs1544410<br><i>ApaI</i> rs7975232<br><i>TaqI</i> rs731236                                                                                                                                                                                                                                     | 296 Czech MS patients and 135 CS                                          | Czech Republic 2018       | Case-control  | <b>Genetic risk to MS:</b> <i>BsmI</i> T (or B) allele (OR=2.05) in men; <i>TaqI</i> G (or t) allele (OR=1.9) in both; <i>ApaI</i> A (or A) allele in men (OR=2.05) and women (OR=1.42) <i>BsmI</i> CC (bb) genotype (OR=3.02) was observed more frequent in women compared to men                                                                                                                                                                                                                                                                           | (106) |
| <i>FokI</i> rs2228570<br><i>BsmI</i> rs1544410<br><i>ApaI</i> rs7975232<br><i>TaqI</i> rs731236                                                                                                                                                                                                                                     | 21 relevant studies involving 3593 MS patients and 3917 CS meta-analysis  | Caucasian and Asians 2017 | Meta-analysis | <b>Protection to MS:</b> <i>FokI</i> F allele (OR=0.764), and FF and Ff genotypes (OR=0.417) in a dominant genetic model in publications after 2013 year; <i>BsmI</i> genotype BB (OR=0.722) in a recessive genetic model in the >40 years age group; <i>ApaI</i> AA and aa genotypes in Asian group (OR=0.743) and the 20.1-30°N latitude group (OR=0.609) in a homozygous genetic model; <i>TaqI</i> TT and tt genotypes (OR=0.846) in a homozygous genetic model, and TT genotype (OR=0.868) in a recessive genetic model in the 40.1-50°N latitude group | (116) |
| <i>FokI</i> rs2228570                                                                                                                                                                                                                                                                                                               | 212 MS patients and 289 CS                                                | Netherlands 2009          | Case-control  | <b>Genetic risk to MS:</b> no association was found<br><b>Lower calcidiol levels:</b> <i>FokI</i> FF genotype ( $p=0.024$ )<br><b>Higher serum calcitriol in winter:</b> F allele ( $p=0.034$ )                                                                                                                                                                                                                                                                                                                                                              | (112) |
| <i>FokI</i> rs2228570<br><i>BsmI</i> rs1544410<br><i>ApaI</i> rs7975232<br><i>TaqI</i> rs731236                                                                                                                                                                                                                                     | 11 case-control studies involving a total of 2599 MS patients and 2816 CS | Worldwide 2012            | Meta-analysis | No genetic risk association to MS was found                                                                                                                                                                                                                                                                                                                                                                                                                                                                                                                  | (110) |
| <i>FokI</i> rs2228570<br><i>BsmI</i> rs1544410<br><i>TaqI</i> rs731236                                                                                                                                                                                                                                                              | Russian MS patients                                                       | Russia 2009               | Case control  | <b>Haplotype Bft (or fBt):</b> Increase genetic risk to MS and clinical manifestations of MS                                                                                                                                                                                                                                                                                                                                                                                                                                                                 | (99)  |
| <i>BsmI</i> rs1544410<br><i>ApaI</i> rs7975232                                                                                                                                                                                                                                                                                      | 77 MS patients and 95 CS                                                  | Japan 2000                | Case control  | <b>Haplotype bA:</b> Genetic risk to MS, higher in MS patients than in controls (OR=10.39)                                                                                                                                                                                                                                                                                                                                                                                                                                                                   | (119) |
| All odds ratios (OR) displayed on this table presented at least $p < 0.05$ . MS: multiple sclerosis; CS: control subjects; GC rs222679 (A>C); CYP2R1 rs10741657 (A>G); CYP27B1 (G>T) <i>FokI</i> rs2228570 (C>T / F>f) ; <i>BsmI</i> rs1544410 (A>G / B>b), <i>ApaI</i> rs7975232 (A>C / A>a), and <i>TaqI</i> rs731236 (C>T / T>t) |                                                                           |                           |               |                                                                                                                                                                                                                                                                                                                                                                                                                                                                                                                                                              |       |

**Table S2.** Studies of polymorphisms in vitamin D metabolism genes and its association with rheumatoid arthritis.

| Gene    | Polymorphism                                                                                    | Population                                                                                            | Location and year     | Study design                     | Association                                                                                                                                                                                                                                                                                                                                                                                                                                                             | Ref   |
|---------|-------------------------------------------------------------------------------------------------|-------------------------------------------------------------------------------------------------------|-----------------------|----------------------------------|-------------------------------------------------------------------------------------------------------------------------------------------------------------------------------------------------------------------------------------------------------------------------------------------------------------------------------------------------------------------------------------------------------------------------------------------------------------------------|-------|
| GC      | rs2282679                                                                                       | 267 Chinese RA patients, 51 patients with AS (ankylosing spondylitis) and 160 CS                      | China 2012            | Case-control                     | <b>Genetic risk to RA:</b> C allele ( $p=0.026$ )                                                                                                                                                                                                                                                                                                                                                                                                                       | (72)  |
|         |                                                                                                 | For RA, GWAS meta-analysis of 5539 autoantibody-positive RA patients and 20169 CS of European descent | Worldwide 2018        | GWAS                             | No genetic risk association to RA was found                                                                                                                                                                                                                                                                                                                                                                                                                             | (74)  |
|         |                                                                                                 | 1957 Japanese RA patients                                                                             | Japan 2014            | Cross-sectional                  | <b>Hip fracture:</b> CC genotype hazard ratio = 2.52<br><b>Lower calcidiol levels:</b> minor C allele ( $p = 8.1 \times 10^{-5}$ )                                                                                                                                                                                                                                                                                                                                      | (73)  |
| CYP2R1  | rs10741657                                                                                      | 211 RA patients and 94 CS                                                                             | Spain 2019            | Case-control                     | <b>Lower calcidiol levels in RA patients:</b> GG genotype (19.70 ng/mL) compared to GA genotype (27.51 ng/mL) and AA genotype (26.16 ng/mL) ( $p = 0.002$ )                                                                                                                                                                                                                                                                                                             | (122) |
| CYP27B1 | rs10877012                                                                                      | No studies were found                                                                                 |                       |                                  |                                                                                                                                                                                                                                                                                                                                                                                                                                                                         |       |
| VDR     | <i>FokI</i> rs2228570<br><i>BsmI</i> rs1544410<br><i>TaqI</i> rs731236                          | 1703 RA patients and 2635 CS in 12 case-control studies                                               | Asian, Caucasian 2015 | Meta-analysis                    | <b>Genetic risk for RA:</b> <i>FokI</i> FF genotype (OR = 1.762) compared to ff genotype; <i>TaqI</i> T allele (OR = 1.397), TT and tt genotypes (OR=1.643) in a homozygous genetic model, TT genotype (OR=1.899) compared to tt genotype, and TT genotype (OR=1.450) compared to Tt genotype in overall populations.<br><b>Probably protection to RA:</b> <i>BsmI</i> B allele (OR = 0.779), and Bb genotype (OR=0.719) compared to bb genotype in overall populations | (129) |
|         | <i>Apal</i> rs7975232<br><i>TaqI</i> rs731236                                                   | 151 Behcet's disease patients, 106 AR patients and 179 CS                                             | Tunisia 2014          | Case-control                     | No genetic risk association to RA was found                                                                                                                                                                                                                                                                                                                                                                                                                             | (136) |
|         | <i>FokI</i> rs2228570                                                                           | 448 native North American natives (NAN) RA patients and 704 NAN CS                                    | Canada 2012           | Case-control                     | <b>Genetic risk to RA:</b> <i>FokI</i> FF and Ff genotypes (OR=1.5) in a dominant genetic model                                                                                                                                                                                                                                                                                                                                                                         | (125) |
|         | <i>FokI</i> rs2228570<br><i>BsmI</i> rs1544410                                                  | 108 RA patients and 152 CS                                                                            | Tunisia 2012          | Case-control                     | <b>Genetic risk to RA:</b> <i>FokI</i> F allele (OR = 1.82)                                                                                                                                                                                                                                                                                                                                                                                                             | (126) |
|         | <i>FokI</i> rs2228570<br><i>BsmI</i> rs1544410<br><i>TaqI</i> rs731236                          | 7 studies, 923 RA patients and 912 CS                                                                 | Worldwide 2016        | Meta-analysis                    | <b>Genetic risk to RA:</b> <i>FokI</i> F allele (OR = 1.402) in Europeans                                                                                                                                                                                                                                                                                                                                                                                               | (128) |
|         | <i>FokI</i> rs2228570<br><i>BsmI</i> rs1544410<br><i>TaqI</i> rs731236                          | 100 RA French nuclear families and 100 additional French nuclear families for replication             | France 2005           | Case family based control design | <b>Higher frequency in RA patients:</b> <i>FokI</i> FF genotype compared to CS (45% vs. 30%, $p=0.01$ )                                                                                                                                                                                                                                                                                                                                                                 | (127) |
|         | <i>FokI</i> rs2228570<br><i>BsmI</i> rs1544410<br><i>Apal</i> rs7975232<br><i>TaqI</i> rs731236 | 105 RA patients and 80 CS                                                                             | Egypt 2015            | Case-control                     | <b>Genetic risk to RA:</b> <i>BsmI</i> GG genotype (OR = 2.704) in a dominant genetic model; <i>Apal</i> GG and GT genotypes (OR = 0.224) in a recessive genetic model; <i>TaqI</i> TT genotype (OR = 2.366) in a dominant genetic model                                                                                                                                                                                                                                | (124) |
|         | <i>TaqI</i> rs731236                                                                            | 184 RA patients, 154 OA patients and 200 CS                                                           | Jordan 2018           | Case-control                     | <b>Lower calcidiol levels:</b> <i>TaqI</i> TT genotype RA patients ( $11.67 \pm 3.24$ ng/mL) compared to <i>TaqI</i> TT genotype CS ( $21.23 \pm 3.43$ ng/mL) ( $p = 0.04$ )                                                                                                                                                                                                                                                                                            | (138) |
|         | <i>BsmI</i> rs1544410                                                                           | 200 female RA patients and 150 CS                                                                     | Egypt 2013            | Case-control                     | <b>Lower bone mineral density:</b> <i>BsmI</i> BB genotype ( $p = 0.0001$ ) in a recessive genetic model                                                                                                                                                                                                                                                                                                                                                                | (151) |

|                                                                                                 |                                                                                                                           |                            |                     |                                                                                                                                                                                                                                                                                                                                                                                                                                                                                                                                                                                                                                                                                                                                                                                                                                                                                                                                                   |       |
|-------------------------------------------------------------------------------------------------|---------------------------------------------------------------------------------------------------------------------------|----------------------------|---------------------|---------------------------------------------------------------------------------------------------------------------------------------------------------------------------------------------------------------------------------------------------------------------------------------------------------------------------------------------------------------------------------------------------------------------------------------------------------------------------------------------------------------------------------------------------------------------------------------------------------------------------------------------------------------------------------------------------------------------------------------------------------------------------------------------------------------------------------------------------------------------------------------------------------------------------------------------------|-------|
| <i>BsmI</i> rs1544410<br><i>Apal</i> rs7975232<br><i>TaqI</i> rs731236                          | 120 Spanish RA patients                                                                                                   | Spain 2001                 | Cross-sectiona<br>l | <b>Earlier onset form of rheumatoid arthritis:</b> <i>TaqI</i> tt genotype (28.80 ± 9.88 years) compared to Tt (44.29 ± 15.51 years) and TT genotypes (43.90 ± 11.75years ) ( $p=0.04$ )                                                                                                                                                                                                                                                                                                                                                                                                                                                                                                                                                                                                                                                                                                                                                          | (135) |
| <i>FokI</i> rs2228570<br><i>BsmI</i> rs1544410<br><i>Apal</i> rs7975232<br><i>TaqI</i> rs731236 | 40 Italian RA patients                                                                                                    | Italy Caucasian 2016       | Cross-sectiona<br>l | <b>Higher bone mineral density at the lumbar spine:</b> <i>TaqI</i> tt genotype (4.7%) compared to TT genotype (0.1%) ( $p < 0.05$ )                                                                                                                                                                                                                                                                                                                                                                                                                                                                                                                                                                                                                                                                                                                                                                                                              | (137) |
| <i>FokI</i> rs2228570<br><i>BsmI</i> rs1544410<br><i>Apal</i> rs7975232<br><i>TaqI</i> rs731236 | 40 RA osteoporosis patients, 88 RA no osteoporosis patients, 30 postmenopausal osteoporotic females and 150 CS from Egypt | Egypt 2014                 | Case-control        | <b>Higher frequency in RA patients:</b> <i>Apal</i> aa genotype ( $p=0.0042$ ); <i>TaqI</i> TT genotype ( $p<0.001$ ).<br><b>Genetic risk to RA:</b> <i>BsmI</i> b allele (OR=2.2); <i>TaqI</i> T allele (OR=2.26).<br><b>Higher frequency in RA osteoporosis patients:</b> <i>FokI</i> Ff genotype ( $p=0.024$ ) compared to RA no osteoporosis patients                                                                                                                                                                                                                                                                                                                                                                                                                                                                                                                                                                                         | (123) |
| <i>FokI</i> rs2228570<br><i>BsmI</i> rs1544410<br><i>Apal</i> rs7975232<br><i>TaqI</i> rs731236 | Meta-analysis of 10 studies, 6 RA and 4 SLE studies                                                                       | Europe and Asia 2011       | Meta-analysis       | <b>Genetic risk to RA:</b> <i>FokI</i> F allele (OR= 1.502)                                                                                                                                                                                                                                                                                                                                                                                                                                                                                                                                                                                                                                                                                                                                                                                                                                                                                       | (130) |
| <i>FokI</i> rs2228570<br><i>TaqI</i> rs731236                                                   | 30 RA patients and 128 CS                                                                                                 | North East Iran<br>2019    | Case-control        | <b>Genetic risk to RA:</b> <i>FokI</i> Ff genotype (OR = 1.68) compared to FF genotype, Ff and ff genotypes (OR=1.86) in a dominant genetic model, and f allele ( $p=0.01$ ); <i>TaqI</i> Tt and TT genotypes (OR = 1.79) in a dominant genetic model, T allele ( $p=0.01$ ), and fT haplotype (OR=3.54)                                                                                                                                                                                                                                                                                                                                                                                                                                                                                                                                                                                                                                          | (131) |
| <i>FokI</i> rs2228570<br><i>BsmI</i> rs1544410                                                  | 208 RA patients                                                                                                           | France<br>and Tunisia 2014 | Cross-sectiona<br>l | <b>Higher disease activity DAS28:</b> <i>FokI</i> TT (or ff) genotype ( $p<0.001$ ); <i>BsmI</i> GG (or bb) genotype ( $p<0.001$ )                                                                                                                                                                                                                                                                                                                                                                                                                                                                                                                                                                                                                                                                                                                                                                                                                | (132) |
| <i>FokI</i> rs2228570<br><i>BsmI</i> rs1544410<br><i>Apal</i> rs7975232                         | Meta-analysis included 23 eligible studies                                                                                | Worldwide 2020             | Meta-analysis       | <b>Protection to RA:</b> <i>FokI</i> ff and Ff genotypes (OR=0.74) in a dominant genetic model, ff genotype (OR=0.66) compared to FF genotype, and Ff genotype (OR=0.85) compared to FF genotype in overall populations; <i>Apal</i> Aa genotype (OR = 0.76) compared to AA genotype in overall populations; <i>TaqI</i> tt and Tt genotypes (OR=0.50) in a dominant genetic model, tt genotype (OR=0.44) in a recessive genetic model, tt genotype (OR=0.32) compared to TT genotype, Tt genotype (OR=0.57) compared to TT genotype, and t allele (OR=0.57) in Africans; <i>TaqI</i> tt genotype (OR=0.53) in a recessive genetic model, and tt genotype (OR=0.43) compared to TT genotype in Arabs<br><b>Genetic risk to RA:</b> <i>BsmI</i> bb and Bb genotypes (OR= 1.82) in a dominant genetic model, bb genotype (OR=1.77) in a recessive genetic model, bb genotype (OR=2.40) compared to BB genotype, and b allele (OR =1.59) in Africans | (134) |
| <i>FokI</i> rs2228570<br><i>BsmI</i> rs1544410<br><i>Apal</i> rs7975232<br><i>TaqI</i> rs731236 | 591 Northern Spanish RA patients                                                                                          | Spain 2016                 | Cross-sectiona<br>l | <b>Haplotype tAbF (or FbAt):</b> Higher risk to have carotid plaques (OR = 1.56)                                                                                                                                                                                                                                                                                                                                                                                                                                                                                                                                                                                                                                                                                                                                                                                                                                                                  | (97)  |

All odds ratios (OR) displayed on this table presented at least  $p < 0.05$ . RA: rheumatoid arthritis; CS: control subjects GC rs222679 (A>C); CYP2R1 rs10741657 (A>G); CYP27B1 (G>T)

*FokI* rs2228570 (C>T / F>f) ; *BsmI* rs1544410 (A>G / B>b), *Apal* rs7975232 (A>C / A>a), and *TaqI* rs731236 (C>T / T>t).

**Table S3.** Studies of polymorphisms in vitamin D metabolism genes and its association with systemic lupus erythematosus.

| Gene | Polymorphism                                                                                    | Population                                                                        | Location and year          | Study design  | Association                                                                                                                                                                                                                                                                                                                                                                                                                                                                           | Ref   |
|------|-------------------------------------------------------------------------------------------------|-----------------------------------------------------------------------------------|----------------------------|---------------|---------------------------------------------------------------------------------------------------------------------------------------------------------------------------------------------------------------------------------------------------------------------------------------------------------------------------------------------------------------------------------------------------------------------------------------------------------------------------------------|-------|
| GC   | rs2282679                                                                                       | GWAS 1311 SLE patients and 1783 CS                                                | European descent<br>2018   | GWAS          | No genetic risk association to SLE was found                                                                                                                                                                                                                                                                                                                                                                                                                                          | (74)  |
|      | <i>FokI</i> rs2228570<br><i>BsmI</i> rs1544410<br><i>ApaI</i> rs7975232                         | 107 unrelated female SLE patients and 129 CS                                      | Egypt 2013                 | Case-control  | <b>Genetic risk to SLE:</b> <i>FokI</i> FF genotype (OR=4.9) and F allele (OR=1.9); <i>BsmI</i> Bb genotype (OR=2.5), BB genotype (OR=5.9) and B allele (OR=2.3); <i>ApaI</i> AA genotype (OR=2.8); aBF (or FBa) haplotype (OR=2.5) and ABF (or FBA) haplotype (OR=6.5).<br><b>Higher SLEDAI scores:</b> <i>FokI</i> FF genotype and <i>BsmI</i> BB genotype ( $p<0.05$ ); ABF (or FBA) haplotype ( $p<0.001$ )<br><b>Lower serum calcidiol:</b> ABF (or FBA) haplotype ( $p=0.006$ ) | (31)  |
|      | <i>FokI</i> rs2228570<br><i>BsmI</i> rs1544410                                                  | 54 SLE patients and 98 CS                                                         | Bulgaria 2016              | Case-control  | <b>Genetic risk to SLE:</b> <i>FokI</i> Ff and ff genotypes (OR=2.6) and f allele (OR=2.14); <i>BsmI</i> Bb and bb genotypes (OR= 2.7) and b allele (OR=2.0)<br><b>Rash malar:</b> <i>BsmI</i> b allele (OR=2.5)                                                                                                                                                                                                                                                                      | (150) |
|      | <i>FokI</i> rs2228570<br><i>BsmI</i> rs1544410                                                  | 45 SLE patients and 40 CS                                                         | Egypt 2017                 | Case-control  | <b>Lower calcidiol levels:</b> <i>FokI</i> : FF genotype compared to Ff and ff genotypes ( $p=0.001$ )<br><b>Higher SLEDAI score:</b> <i>FokI</i> FF genotype compared to Ff and ff genotypes ( $p=0.02$ )<br><b>Higher SLICC score:</b> <i>FokI</i> FF genotype compared to Ff and ff genotypes ( $p=0.002$ )                                                                                                                                                                        | (82)  |
|      | <i>FokI</i> rs2228570<br><i>TaqI</i> rs731236                                                   | 331 female SLE patients and 282 CS                                                | India 2018                 | Case-control  | <b>Genetic risk to SLE:</b> <i>FokI</i> Ff genotype (OR=2.80), ff genotype (OR=2.57) and f allele (OR=1.96); <i>TaqI</i> : Tt genotype (OR=2.07) and t allele (OR=1.60)                                                                                                                                                                                                                                                                                                               | (91)  |
|      | <i>FokI</i> rs2228570<br><i>ApaI</i> rs7975232<br><i>TaqI</i> rs731236                          | 127 SLE patients and 139 CS                                                       | Southeast Iran 2019        | Case-control  | <b>Genetic risk to SLE:</b> <i>FokI</i> : Ff genotype (OR=1.80); <i>TaqI</i> Tt genotype (OR=2.80) and <i>FokI</i> , <i>ApaI</i> and <i>TaqI</i> tAf (or fAt) haplotype (OR=2.7)                                                                                                                                                                                                                                                                                                      | (96)  |
|      | <i>FokI</i> rs2228570<br><i>BsmI</i> rs1544410<br><i>ApaI</i> rs7975232<br><i>TaqI</i> rs731236 | 258 SLE patients and 545 CS                                                       | Poland 2013                | Case-control  | No genetic risk association to SLE was found.<br><b>Renal disease:</b> <i>FokI</i> FF and Ff genotypes (OR = 3.228)                                                                                                                                                                                                                                                                                                                                                                   | (140) |
|      | <i>FokI</i> rs2228570<br><i>BsmI</i> rs1544410<br><i>ApaI</i> rs7975232<br><i>TaqI</i> rs731236 | 11 studies with 1621 SLE patients and 1883 CS were included in this meta-analysis | Asia and Caucasian<br>2014 | Meta-analysis | <b>Genetic risk to SLE:</b> <i>FokI</i> FF genotype (OR=1.469) compared to Ff and ff genotypes in Asians; <i>BsmI</i> B allele in overall populations (OR=1.726) and Asians (OR=1.952)                                                                                                                                                                                                                                                                                                | (143) |
|      | <i>FokI</i> rs2228570<br><i>ApaI</i> rs7975232<br><i>TaqI</i> rs731236                          | 12 studies meta-analysis, 1974 SLE patients and 2506 CS                           | Asia and Europe<br>2018    | Meta-analysis | <b>Genetic risk to SLE:</b> <i>FokI</i> F allele in Arab population (OR = 1.721)                                                                                                                                                                                                                                                                                                                                                                                                      | (145) |
|      | <i>FokI</i> rs2228570<br><i>BsmI</i> rs1544410<br><i>ApaI</i> rs7975232<br><i>TaqI</i> rs731236 | Meta-analysis of 10 studies, 6 RA and 4 SLE studies                               | European and Asian<br>2011 | Meta-analysis | <b>Genetic risk to SLE:</b> <i>BsmI</i> B allele in Asians (OR = 3.584)<br><b>Lupus nephritis:</b> <i>BsmI</i> B allele (OR= 3.652) in Asians                                                                                                                                                                                                                                                                                                                                         | (130) |
| VDR  | <i>FokI</i> rs2228570                                                                           | 52 SLE patients and 90 CS                                                         | China 2001                 | Case-control  | No genetic risk association to SLE was found                                                                                                                                                                                                                                                                                                                                                                                                                                          | (141) |

|                                                                                                 |                                                                                  |                                      |               |                                                                                                                                                                                                                                                                                                                                                                                                                         |       |
|-------------------------------------------------------------------------------------------------|----------------------------------------------------------------------------------|--------------------------------------|---------------|-------------------------------------------------------------------------------------------------------------------------------------------------------------------------------------------------------------------------------------------------------------------------------------------------------------------------------------------------------------------------------------------------------------------------|-------|
| <i>FokI</i> rs2228570<br><i>BsmI</i> rs1544410<br><i>ApaI</i> rs7975232<br><i>TaqI</i> rs731236 | 13 studies in SLE patients and CS                                                | Worldwide 2015                       | Meta-analysis | <b>Genetic risk to SLE:</b> <i>BsmI</i> B allele (OR=1.60) in overall populations<br><b>Protection to SLE:</b> <i>FokI</i> ff genotype (OR=0.66) and f allele (OR=0.75); <i>BsmI</i> bb genotype (OR=0.51); <i>ApaI</i> aa genotype (OR=0.77) in overall populations                                                                                                                                                    | (149) |
| <i>FokI</i> rs2228570<br><i>BsmI</i> rs1544410                                                  | 195 SLE patients and 201 CS                                                      | Brazil 2012                          | Case-control  | <b>Lower calcidiol levels in SLE:</b> <i>FokI</i> FF genotype compared to ff genotype (23.0 ± 9.2 ng/ml vs. 31.6 ± 14.1 ng/ml; $p=0.004$ )                                                                                                                                                                                                                                                                              | (146) |
| <i>FokI</i> rs2228570<br><i>BsmI</i> rs1544410<br><i>ApaI</i> rs7975232<br><i>TaqI</i> rs731236 | 170 SLE patients and 192 ethnicity paired CS                                     | Portugal 2015                        | Case-control  | <b>Higher SLICC:</b> <i>FokI</i> CT (or Ff) genotype compared to CC (or FF) and TT (or ff) genotypes ( $p=0.031$ ); <i>TaqI</i> : TT (or tt) genotype compared to CC (or TT) and CT (or Tt) genotypes ( $p=0.046$ )<br>No genetic risk association to SLE was found                                                                                                                                                     | (147) |
| <i>FokI</i> rs2228570                                                                           | 300 SLE patients and 300 age, sex, and ethnicity-matched CS                      | Egypt 2017                           | Case-control  | <b>Genetic risk to SLE:</b> <i>FokI</i> F allele (OR = 1.6), and FF genotype (OR=2.7) compared to ff genotype<br><b>Lupus nephritis:</b> <i>FokI</i> FF genotype (OR=4.8) compared to Ff and ff genotypes<br><b>Higher SLEDAI-2K score:</b> <i>FokI</i> FF genotype compared to Ff and ff genotypes ( $p=0.01$ )<br><b>Lower calcidiol levels:</b> <i>FokI</i> FF genotype compared to Ff and ff genotypes ( $p<0.01$ ) | (142) |
| <i>FokI</i> rs2228570<br><i>BsmI</i> rs1544410<br><i>ApaI</i> rs7975232<br><i>TaqI</i> rs731236 | 11 case-control studies of 1683 SLE patients and 1883 unrelated CS meta-analysis | Asian, Latin america and Europe 2014 | Meta-analysis | <b>Genetic risk to SLE:</b> <i>FokI</i> FF and Ff genotypes in overall populations (OR=1.75) and Asians (OR=3.36) in a dominant genetic model; <i>BsmI</i> BB and Bb genotypes in overall populations (OR=2.14) and Asians (OR=2.86) in a dominant genetic model                                                                                                                                                        | (144) |
| <i>BsmI</i> rs1544410                                                                           | 62 SLE patients and 100 CS                                                       | Poland 2013                          | Case-control  | <b>Higher levels of antinuclear antibodies (ANAs) in SLE:</b> <i>BsmI</i> AA genotype ( $r=0.438$ ; $p=0.002$ ) compared to GG and GA genotypes. No genetic risk association to SLE was found                                                                                                                                                                                                                           | (148) |
| <i>FokI</i> rs2228570<br><i>BsmI</i> rs1544410                                                  | 100 SLE patients, 100 osteoarthritic patients and 100 CS                         | Egypt 2017                           | Case-control  | <b>Haplotype fb:</b> Higher frequency in SLE patients than CS ( $p=0.01$ )                                                                                                                                                                                                                                                                                                                                              | (98)  |

All odds ratios (OR) displayed on this table presented at least  $p < 0.05$ . SLE: systemic lupus erythematosus; CS: control subjects; GC rs222679 (A>C); CYP2R1 rs10741657 (A>G); CYP27B1 (G>T) *FokI* rs2228570 (C>T / F>f) ; *BsmI* rs1544410 (A>G / B>b), *ApaI* rs7975232 (A>C / A>a), and *TaqI* rs731236 (C>T / T>t).
